# Supplementary material
Source: PubMed Central journal article supplement (PMC6648470)
Supplement: ao8b03540_si_001.pdf [file ao8b03540_si_001.pdf]

**Enhanced NO<sub>2</sub> sensing at room temperature with graphene  
via monodisperse polystyrene bead decoration**

*Haifeng Fei<sup>†</sup>, Gang Wu<sup>‡</sup>, Wei-Ying Cheng<sup>l</sup>, Wenjie Yan<sup>†</sup>, Hongjun Xu<sup>†</sup>, Duan Zhang<sup>⊔</sup>,  
Yanfeng Zhao<sup>†</sup>, Yanhui Lv<sup>†</sup>, Yanhui Chen,<sup>⊥</sup> Lei Zhang<sup>§</sup>, Cormac Ó Coileáin<sup>†</sup>, Chenglin  
Heng<sup>†</sup>, Ching-Ray Chang<sup>#,\*</sup>, Han-Chun Wu<sup>†,\*</sup>*

<sup>†</sup>School of Physics, Beijing Institute of Technology, Beijing 100081, P. R. China

<sup>‡</sup>School of Materials Science and Engineering, Tongji University, Shanghai, 201804, P.  
R. China

<sup>l</sup>Graduate Institute of Applied Physics, National Taiwan University, Taipei 106, Taiwan

<sup>⊔</sup>Elementary Educational College, Beijing key Laboratory for Nano-Photonics and  
Nano-Structure, Capital Normal University, Beijing 100048, P. R. China

<sup>⊥</sup>Institute of Microstructure and Property of Advanced Materials, Beijing University of  
Technology, Beijing, 100124, China

<sup>§</sup>School of Chemical Engineering and Technology, Tianjin University, Tianjin 300072,  
P. R. China

<sup>#</sup>Department of Physics, National Taiwan University, Taipei 106, Taiwan

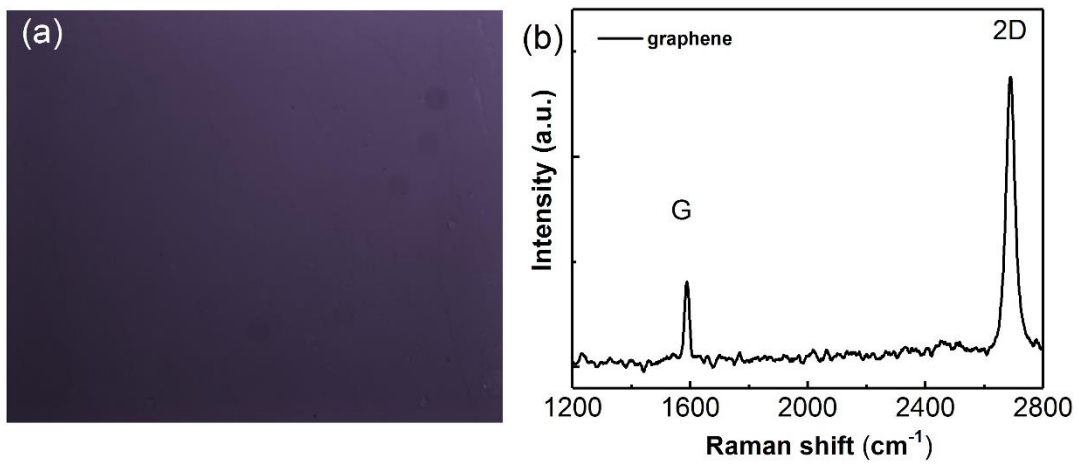

**Figure S1.** (a) Optical image and (b) corresponding Raman spectra of graphene on Si substrate with a 300 nm SiO<sub>2</sub>.

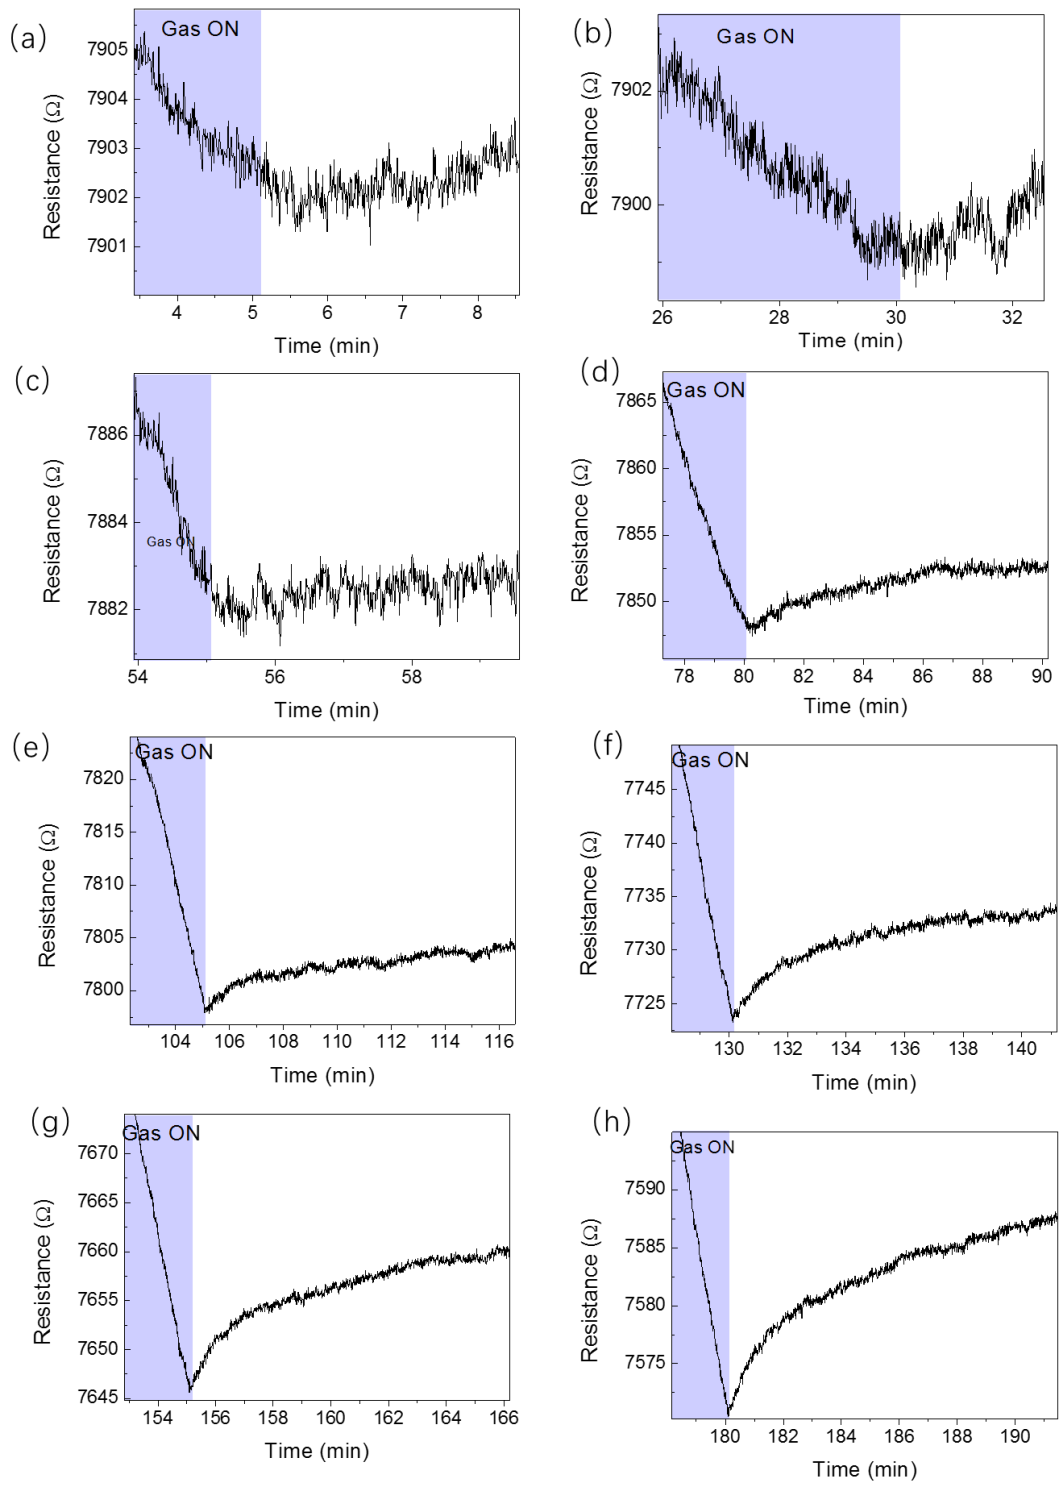

**Figure S2.** Magnified gas sensing dynamics under each gas concentration in Fig. 3b.

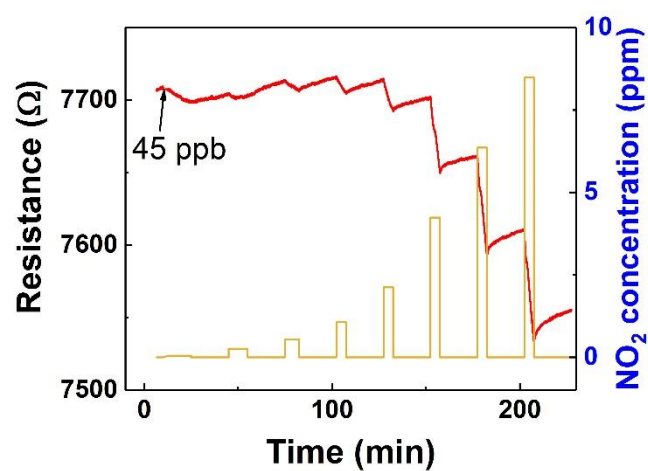

**Figure S3.** Dynamic-sensing response of the graphene sensor after PS bead drop coating measured under 635 nm photo-illumination.

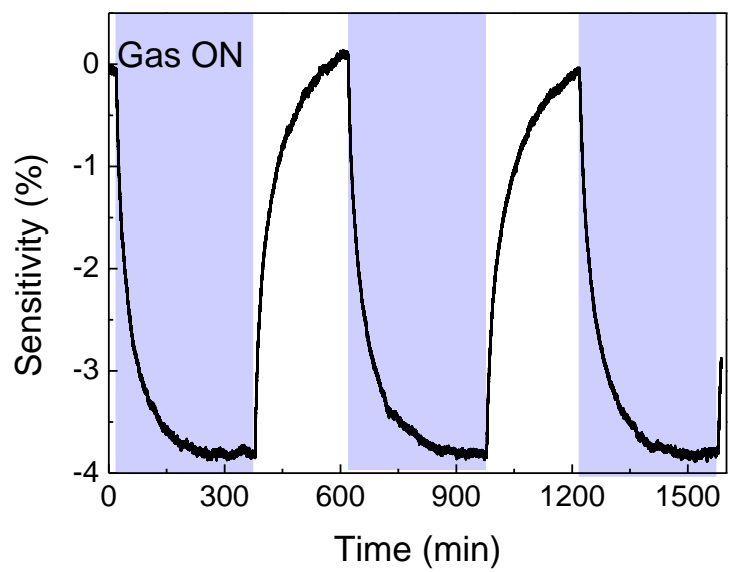

Figure S4. Multi-cycle responses of sensor when exposed to 8800 ppb NO<sub>2</sub>.

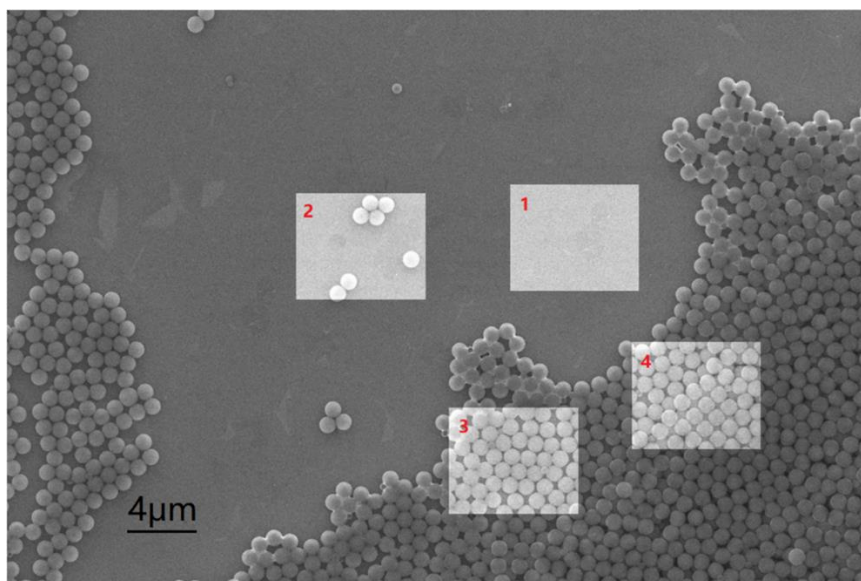

**Figure S5.** Low magnification SEM images for Figure 4b and the areas 1-4 with different PS bead distribution are clearly marked.

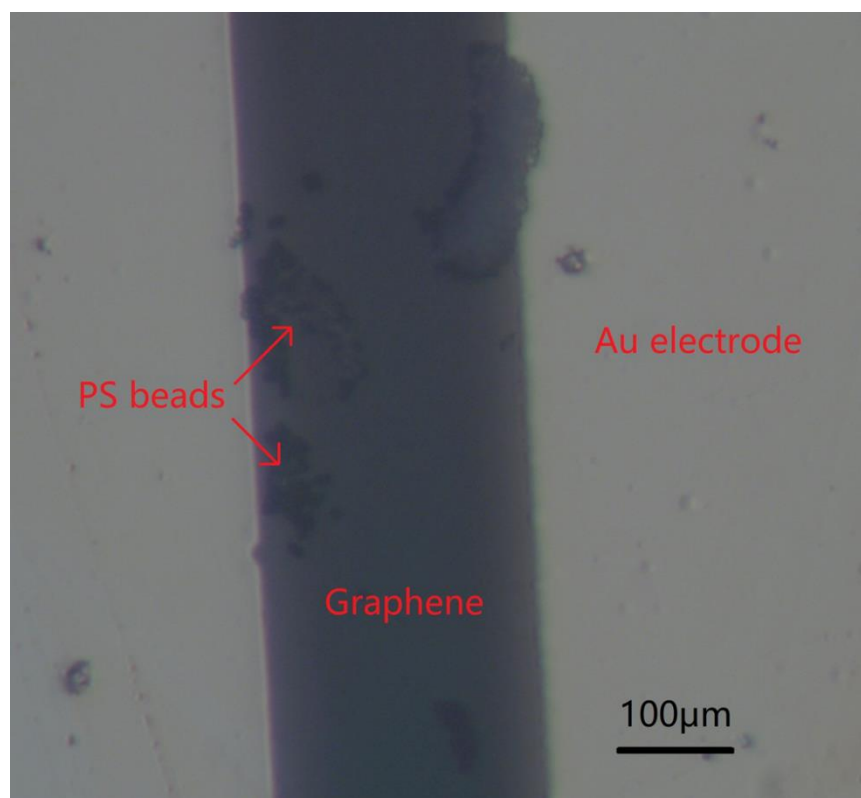

**Figure S6.** Typical photographic image of a device.

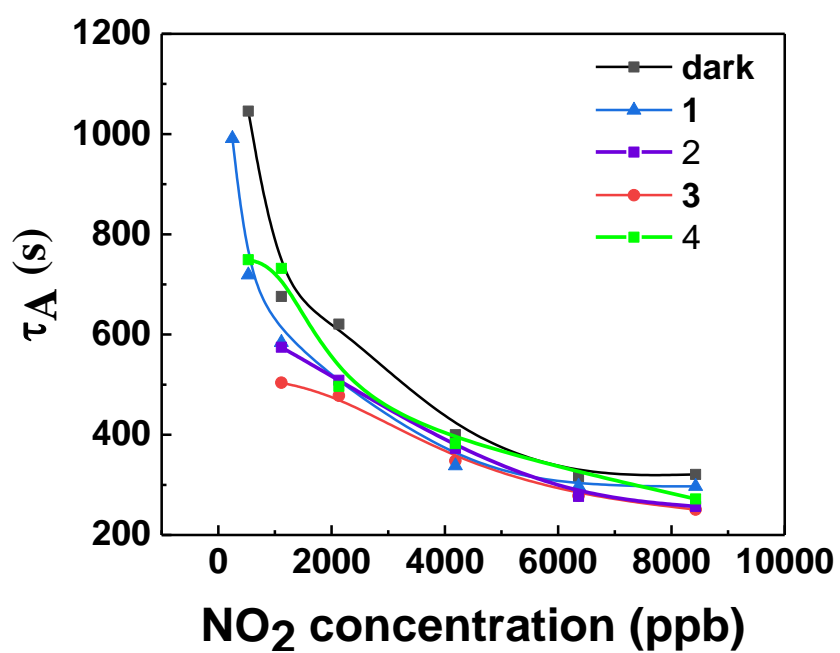

Figure S7. Adsorption time as a function of gas concentration for a variety PS coverage concentration illumination conditions.

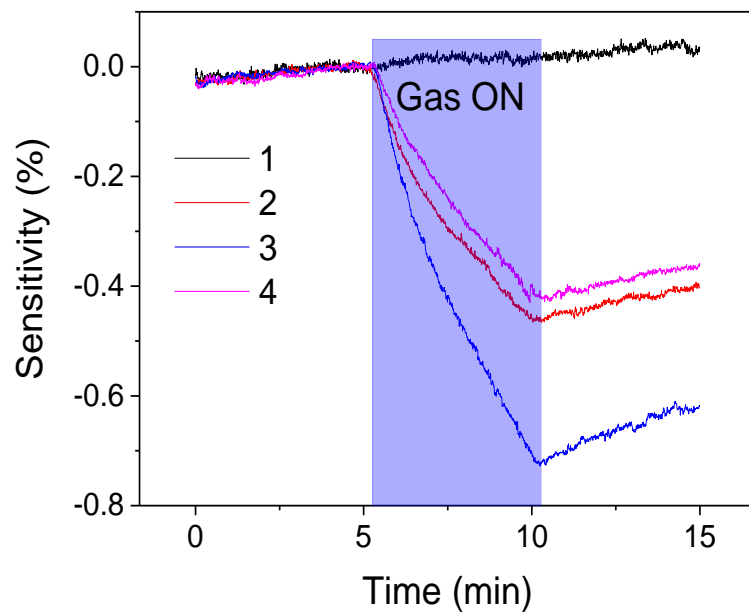

**Figure S8.** Dynamic-sensing response of four graphene sensors with different PS concentrations measured in darkness against 250 ppb NO<sub>2</sub>, where, 1, 2, 3, and 4 denote devices without PS (1), with few PS beads (2), with a monolayer PS beads (3), and with multilayers PS beads (4), respectively.



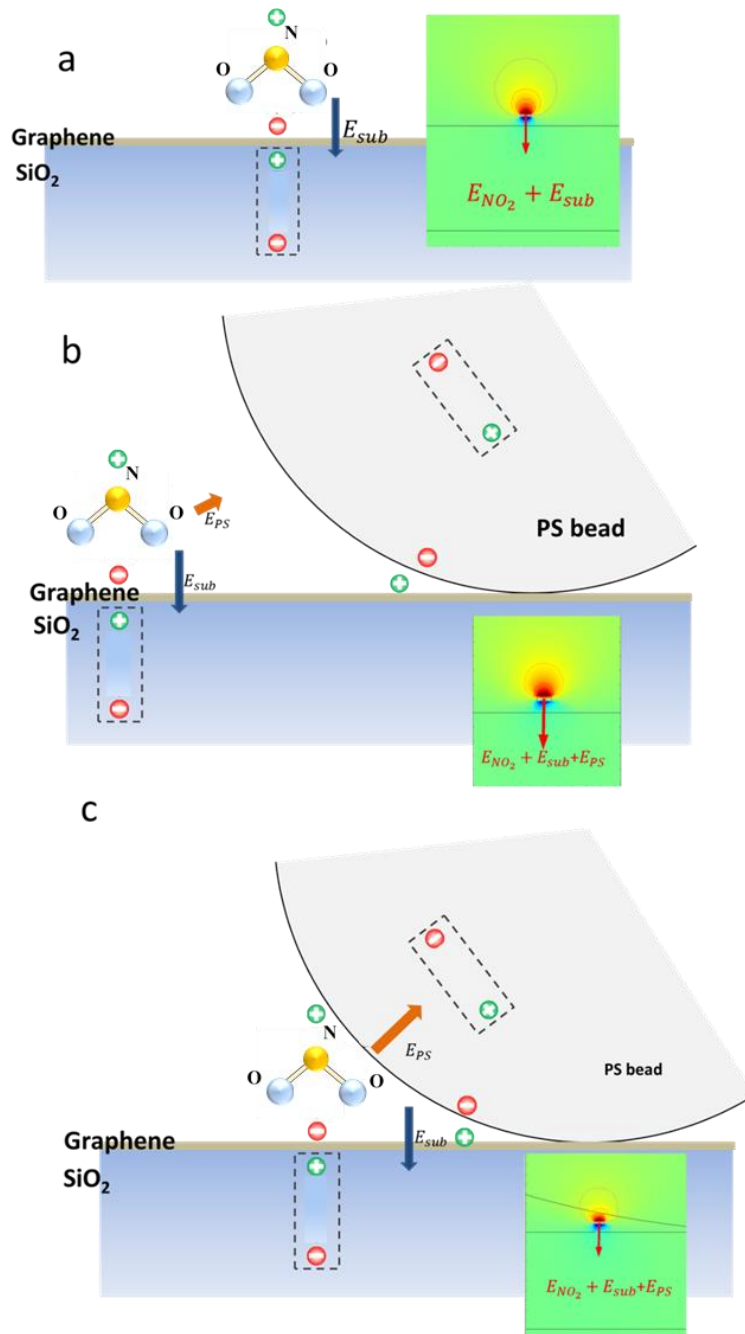

**Figure S9.** (a) Simulated the electric field of NO<sub>2</sub> molecular on top of graphene, the total electric field of NO<sub>2</sub> molecular equal to the dipole field of NO<sub>2</sub> molecular  $E_{NO_2}$  plus the image field of the Graphene/SiO<sub>2</sub> substance  $E_{sub}$ . (b) Simulated electric field potentials of NO<sub>2</sub> molecular near the Graphene/PS beads interface, the enhanced electric field of NO<sub>2</sub> molecular due to the image field of PS sphere  $E_{PS}$ . (c) Simulated electric field potentials of NO<sub>2</sub> molecular absorbed into the concave of Graphene and PS beads, the effect of  $E_{PS}$  is more obvious than (b).
